# Supplementary material
Source: PubMed Central journal article supplement (PMC3840083)
Supplement: NIHMS512185-supplement-01.pdf [file NIHMS512185-supplement-01.pdf]

**Table S1. Comparison of characteristics among participants included in study versus those excluded from study**

| Characteristic                                 | Total CRIC population (N=3939) | Study population (N=3481) | Excluded participants (N= 458) |
|------------------------------------------------|--------------------------------|---------------------------|--------------------------------|
| Mean age, years                                | 58.2 ± 11.0                    | 58.6 ± 10.9               | 55.2 ± 11.5                    |
| Women (%)                                      | 45.1                           | 45.3                      | 44.1                           |
| Race (%)                                       |                                |                           |                                |
| White/Caucasian (%)                            | 46.3                           | 47.7                      | 35.4                           |
| Black/African American (%)                     | 42.1                           | 41.8                      | 44.3                           |
| Other (%)                                      | 11.6                           | 10.5                      | 20.3                           |
| Diabetes mellitus (%)                          | 48.4                           | 46.7                      | 61.8                           |
| Serum creatinine, mg/dL, mean (SD)             | 1.8 ± 0.6                      | 1.8 ± 0.6                 | 2.0 ± 0.8                      |
| eGFR, ml/min/1.73m <sup>2</sup> , mean (SD)    | 42.8 ± 13.5                    | 43.1 ± 13.4               | 40.6 ± 14.3                    |
| Median PCR (IQR) (mg/g)                        | 150 (60, 780)                  | 140 (60, 650)             | 1450 (80, 8710)                |
| Median ACR, mg/g (IQR)                         | 51.9 (8.7, 458.8)              | 45.7 (8.1, 372.2)         | 1227.0 (25.4, 6052.1)          |
| Systolic blood pressure, mm Hg, mean (SD)      | 128.5 ± 22.2                   | 127.4 ± 21.5              | 137.1 ± 25.3                   |
| Diastolic blood pressure, mm Hg, mean (SD)     | 71.5 ± 12.7                    | 71.0 ± 12.5               | 75.6 ± 13.1                    |
| Hemoglobin level, g/dL, mean (SD)              | 12.6 ± 1.8                     | 12.6 ± 1.8                | 12.2 ± 1.9                     |
| Bicarbonate level, mmol/L, mean (SD)           | 24.4 ± 3.2                     | 24.5 ± 3.2                | 23.7 ± 3.4                     |
| Phosphate level, mg/dL, mean (SD)              | 3.7 ± 0.7                      | 3.7 ± 0.6                 | 4.0 ± 0.8                      |
| Albumin level, g/dL, mean (SD)                 | 3.9 ± 0.5                      | 4.0 ± 0.4                 | 3.6 ± 0.7                      |
| Potassium level, mmol/L, mean (SD)             | 4.3 ± 0.5                      | 4.3 ± 0.5                 | 4.4 ± 0.6                      |
| Parathyroid hormone level, pg/mL, median (IQR) | 54.0 (35.0, 89.6)              | 53.0 (34.5, 86.7)         | 67.7 (38.0, 110.8)             |
| Any cardiovascular disease (%)                 | 33.4                           | 33.1                      | 35.8                           |
| BMI, kg/m <sup>2</sup> , mean (SD)             | 32.1 ± 7.8                     | 32.1 ± 7.8                | 31.8 ± 7.7                     |
| ACE inhibitor/ARB use (%)                      | 68.7                           | 68.6                      | 69.7                           |
