# Supplementary material
Source: PubMed Central journal article supplement (PMC3840083)

**Figure S1 . Spline curves for the adjusted\* association between albumin-to-creatinine ratio (ACR) and protein-to-creatinine ratio (PCR) and (a) serum hemoglobin; (b) serum bicarbonate; (c) serum parathyroid hormone (PTH); (d) serum phosphorus; (e) serum potassium and (f) serum albumin in diabetic and non-diabetic participants**

\*adjusted for eGFR

(a)

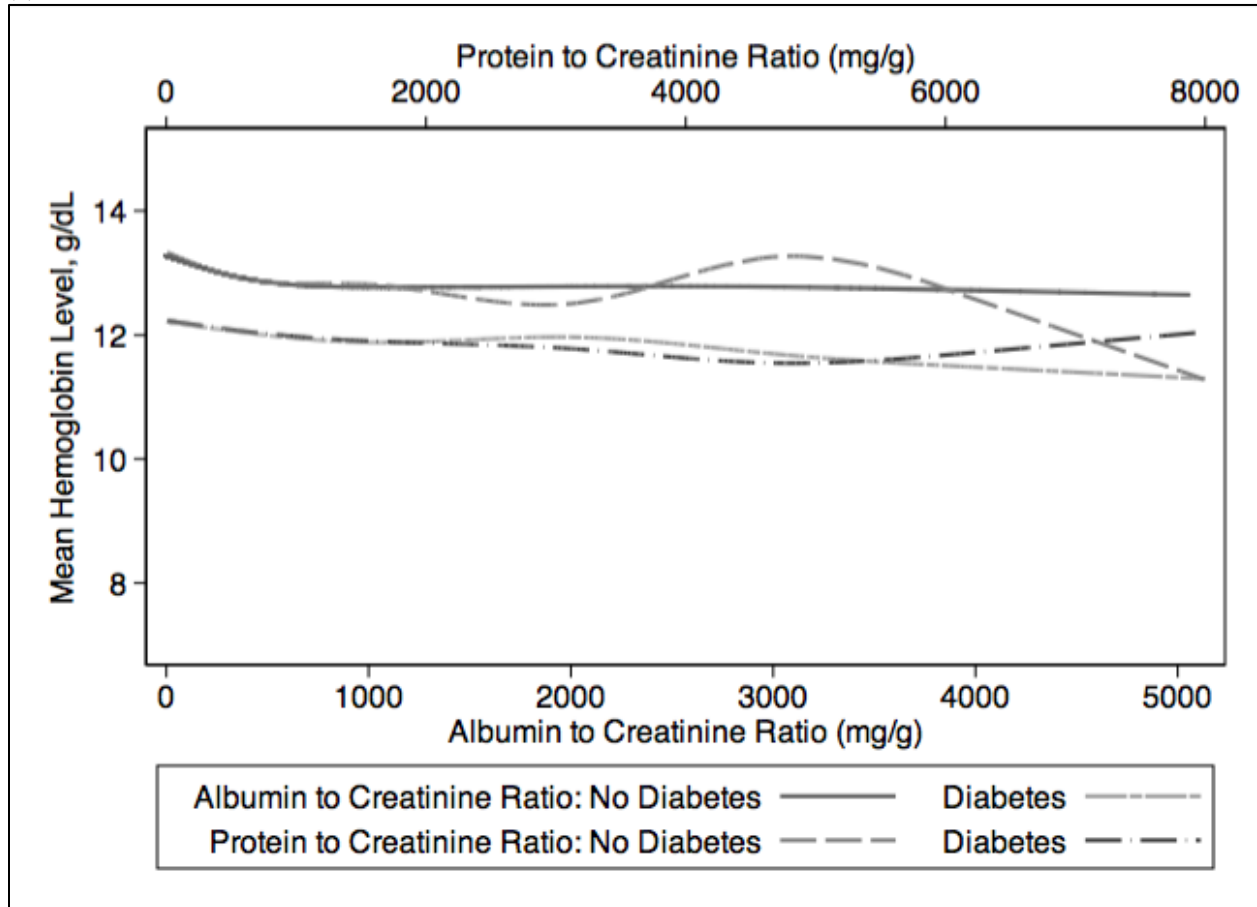

(b)

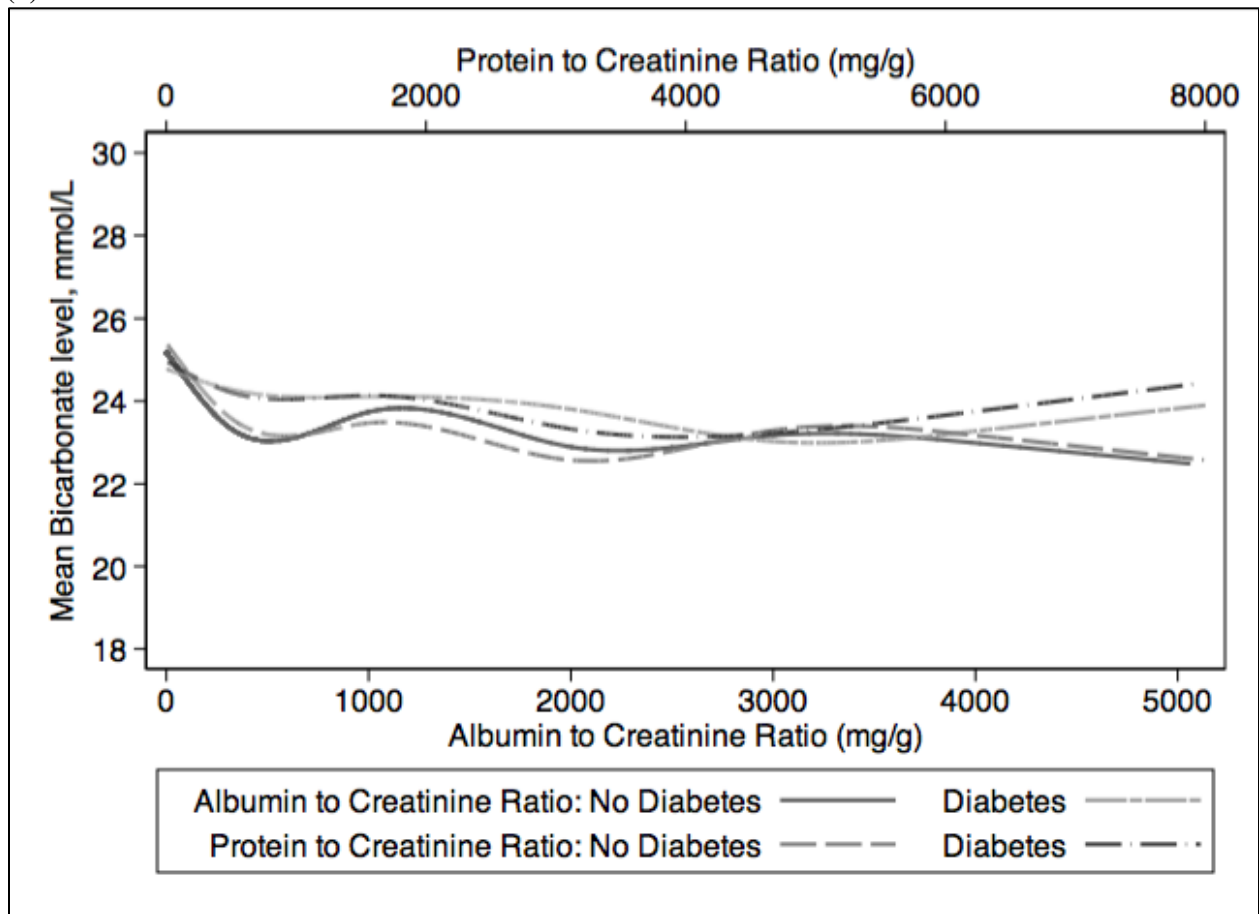

(c)

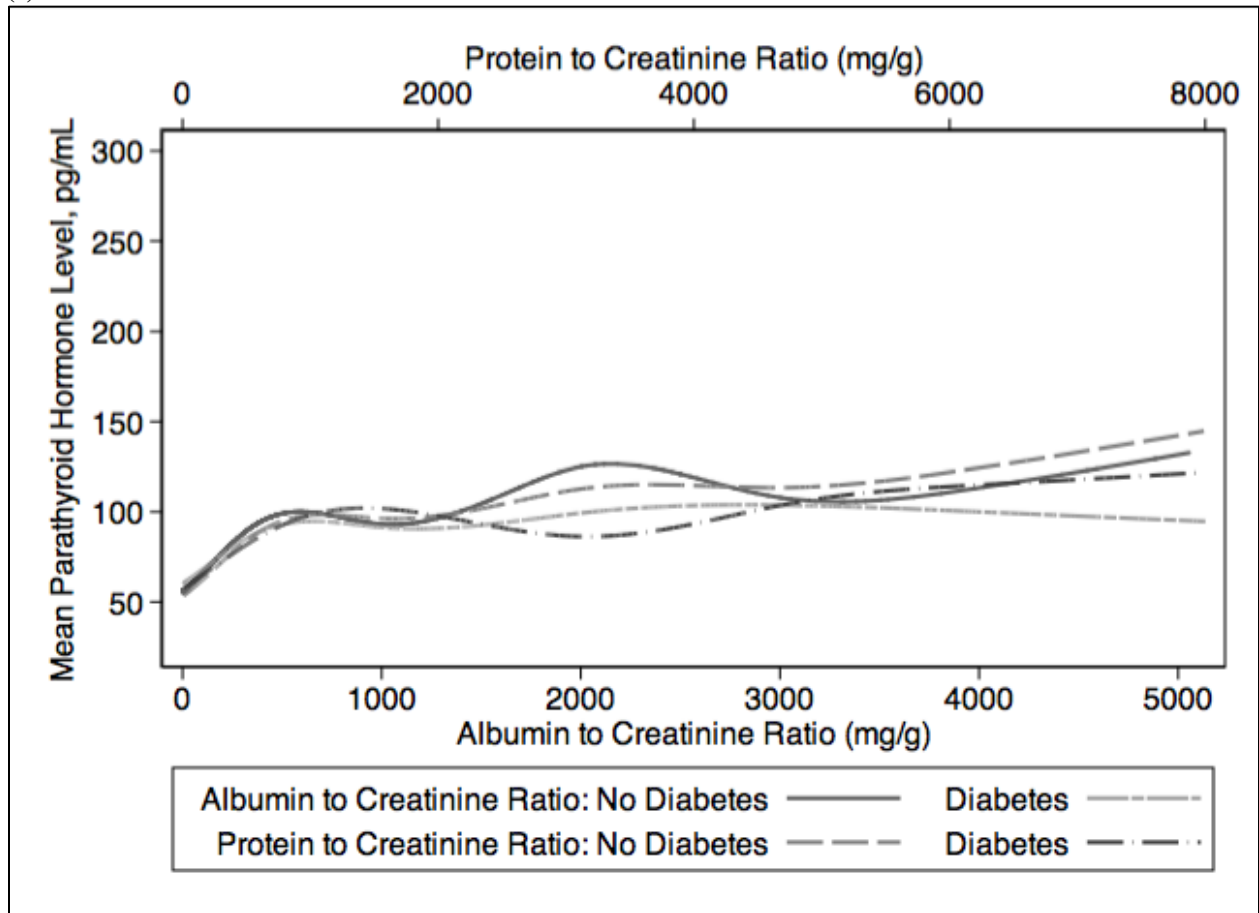

(d)

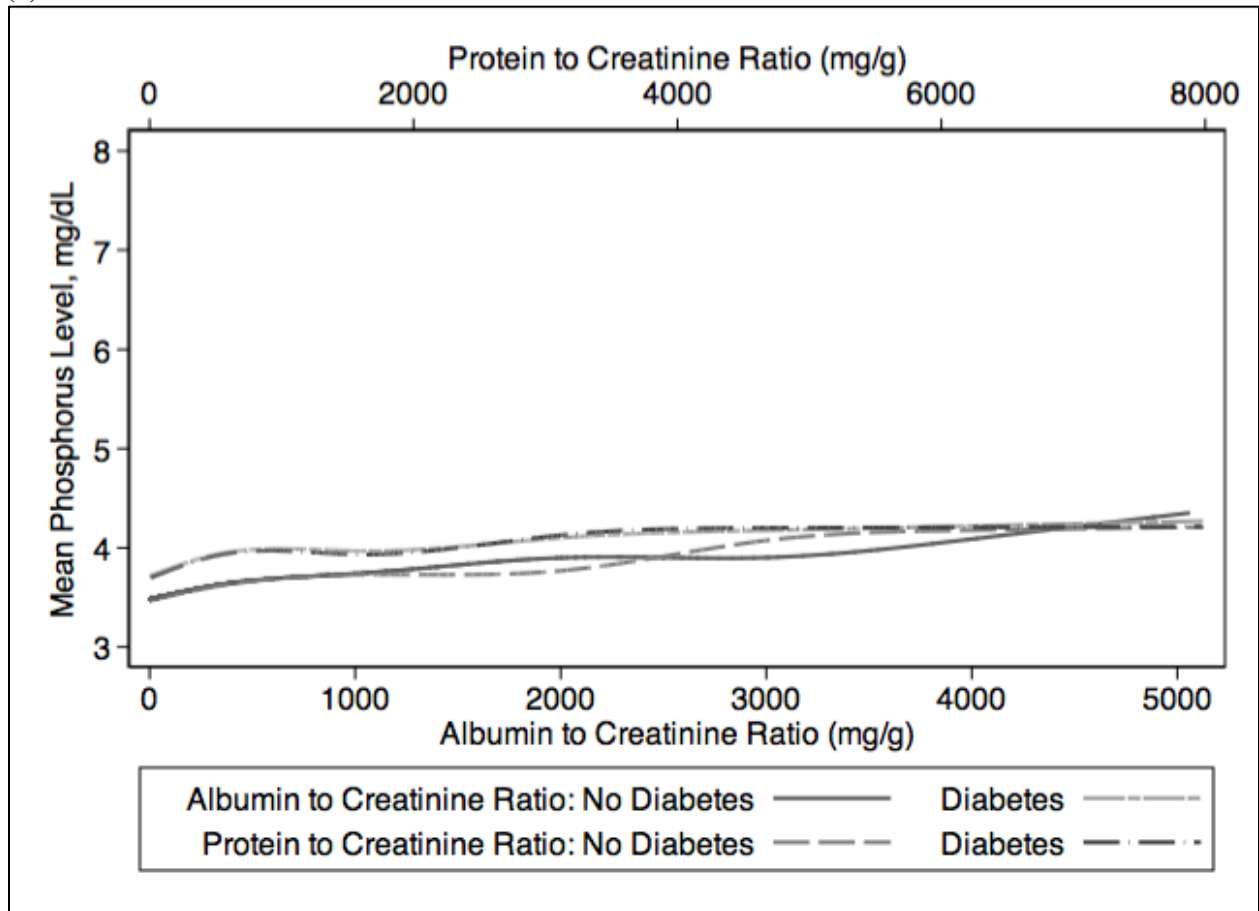

(e)

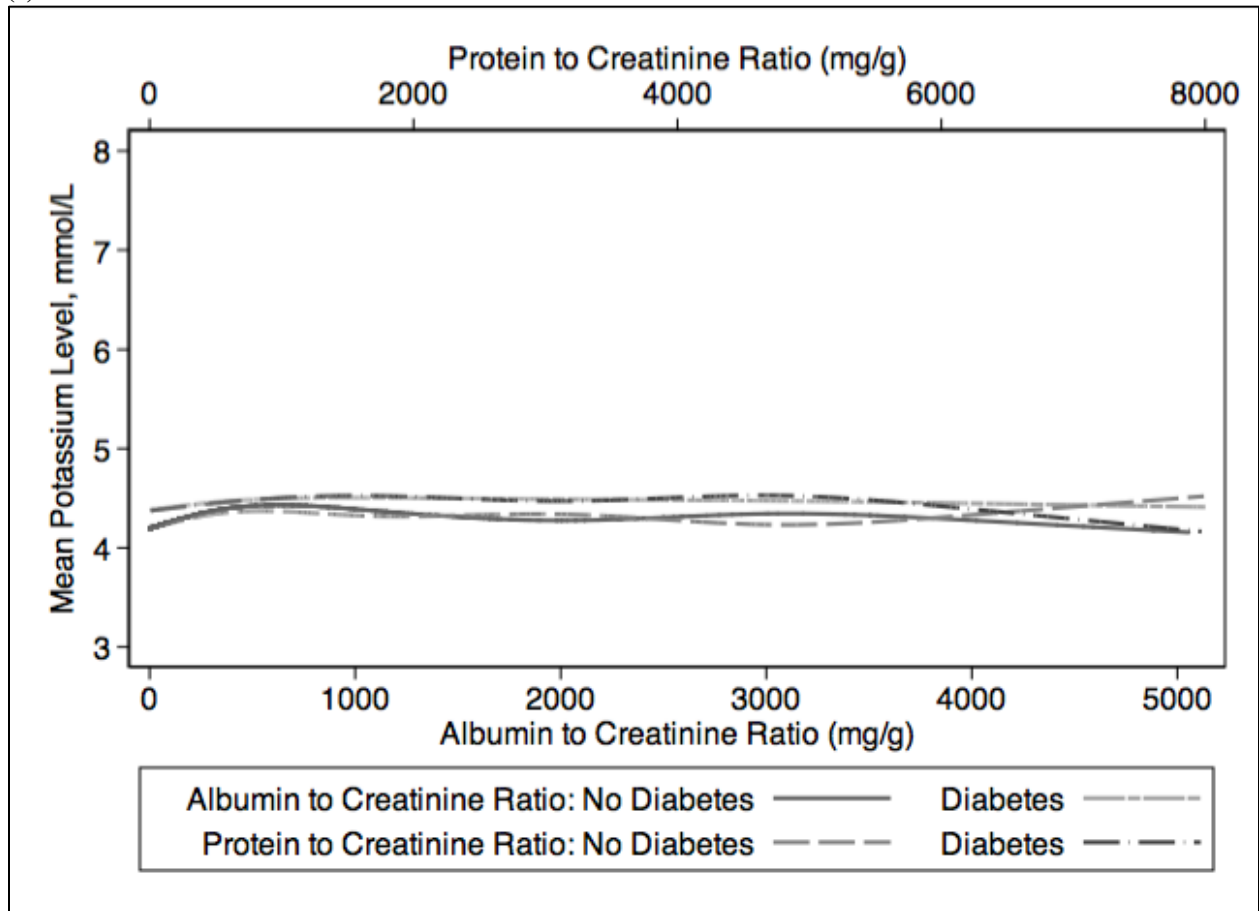

(f)

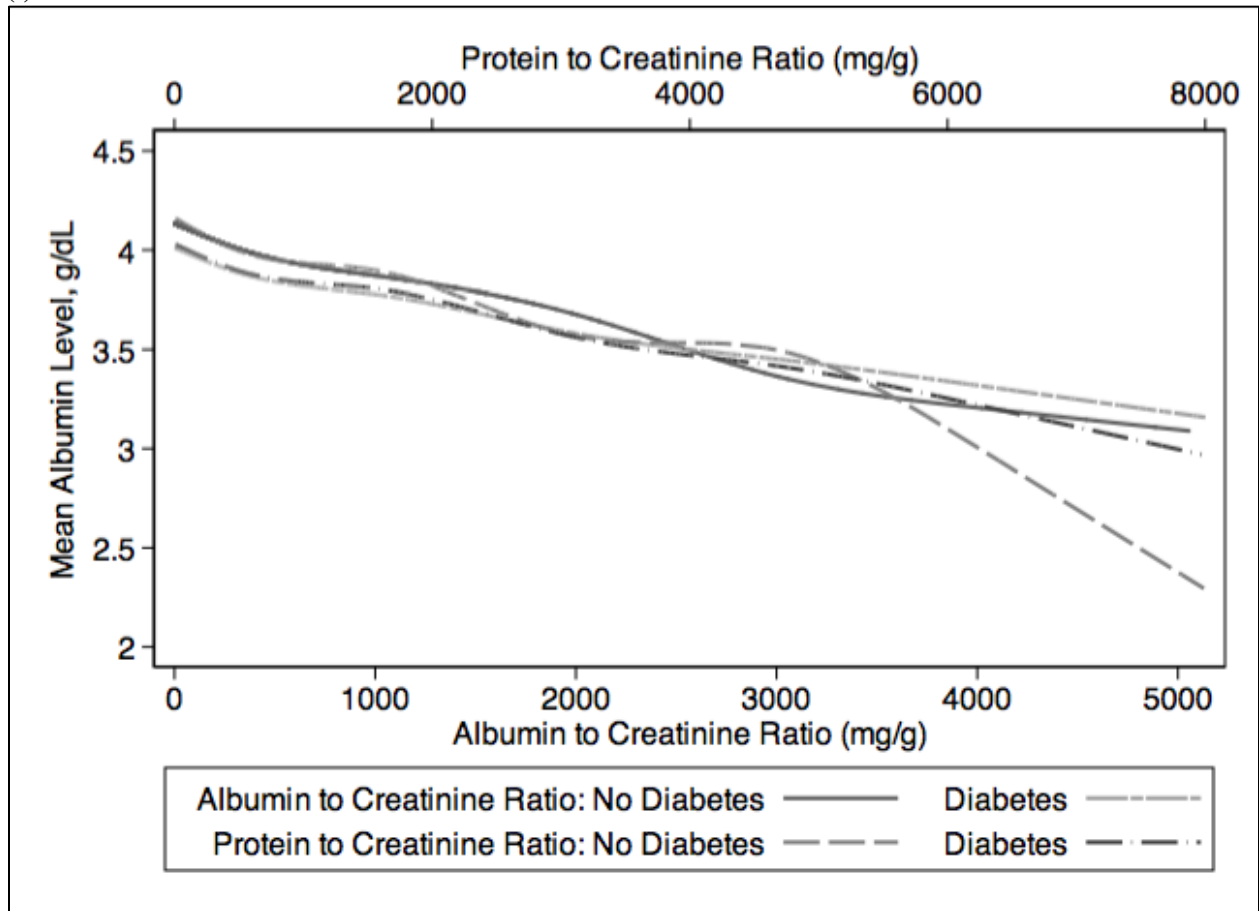

Supplement: NIHMS512185-supplement-02.pdf [file NIHMS512185-supplement-02.pdf]
